# Supplementary material for: Identification of novel biomarkers in obstructive sleep apnea via integrated bioinformatics analysis and experimental validation
Source: PeerJ journal article supplement (doi:10.7717/peerj.16608), 2023-12-04
Supplement: RTPCR.zip [file PCR1.xlsx]

## Sheet: Sheet1
Date	ID	Well	Sample Name	Reporter	Sample Type	Item	Ct	Quantity	Test Result	Qualitative(Ct)	Quantitative(Copy)
2023-06-15	1	A1	A1	SYBR GREEN	Unknown	GAPDH	24.41	-	Positive	38	500
2023-06-15	73	A10	A1	SYBR GREEN	Unknown	C12orf54	31.11	-	Positive	38	500
2023-06-15	81	A11	A2	SYBR GREEN	Unknown	C12orf54	32.87	-	Positive	38	500
2023-06-15	89	A12	A3	SYBR GREEN	Unknown	C12orf54	31.2	-	Positive	38	500
2023-06-15	9	A2	A2	SYBR GREEN	Unknown	GAPDH	24.52	-	Positive	38	500
2023-06-15	17	A3	A3	SYBR GREEN	Unknown	GAPDH	24.84	-	Positive	38	500
2023-06-15	25	A4	A4	SYBR GREEN	Unknown	GAPDH	23.92	-	Positive	38	500
2023-06-15	33	A5	A5	SYBR GREEN	Unknown	GAPDH	24.53	-	Positive	38	500
2023-06-15	41	A6	A6	SYBR GREEN	Unknown	GAPDH	24.62	-	Positive	38	500
2023-06-15	49	A7	A7	SYBR GREEN	Unknown	GAPDH	24.31	-	Positive	38	500
2023-06-15	57	A8	A8	SYBR GREEN	Unknown	GAPDH	23.98	-	Positive	38	500
2023-06-15	65	A9	A9	SYBR GREEN	Unknown	GAPDH	23.87	-	Positive	38	500
2023-06-15	2	B1	B1	SYBR GREEN	Unknown	GAPDH	24.62	-	Positive	38	500
2023-06-15	74	B10	A4	SYBR GREEN	Unknown	C12orf54	34.51	-	Positive	38	500
2023-06-15	82	B11	A5	SYBR GREEN	Unknown	C12orf54	33.29	-	Positive	38	500
2023-06-15	90	B12	A6	SYBR GREEN	Unknown	C12orf54	32.5	-	Positive	38	500
2023-06-15	10	B2	B2	SYBR GREEN	Unknown	GAPDH	24.62	-	Positive	38	500
2023-06-15	18	B3	B3	SYBR GREEN	Unknown	GAPDH	24.41	-	Positive	38	500
2023-06-15	26	B4	B4	SYBR GREEN	Unknown	GAPDH	23.63	-	Positive	38	500
2023-06-15	34	B5	B5	SYBR GREEN	Unknown	GAPDH	23.95	-	Positive	38	500
2023-06-15	42	B6	B6	SYBR GREEN	Unknown	GAPDH	24.32	-	Positive	38	500
2023-06-15	50	B7	B7	SYBR GREEN	Unknown	GAPDH	24.12	-	Positive	38	500
2023-06-15	58	B8	B8	SYBR GREEN	Unknown	GAPDH	24.24	-	Positive	38	500
2023-06-15	66	B9	B9	SYBR GREEN	Unknown	GAPDH	23.42	-	Positive	38	500
2023-06-15	3	C1	A1	SYBR GREEN	Unknown	FOS	32.25	-	Positive	38	500
2023-06-15	75	C10	A7	SYBR GREEN	Unknown	C12orf54	31.5	-	Positive	38	500
2023-06-15	83	C11	A8	SYBR GREEN	Unknown	C12orf54	32.78	-	Positive	38	500
2023-06-15	91	C12	A9	SYBR GREEN	Unknown	C12orf54	37.58	-	Positive	38	500
2023-06-15	11	C2	A2	SYBR GREEN	Unknown	FOS	32.66	-	Positive	38	500
2023-06-15	19	C3	A3	SYBR GREEN	Unknown	FOS	31.44	-	Positive	38	500
2023-06-15	27	C4	A4	SYBR GREEN	Unknown	FOS	31.68	-	Positive	38	500
2023-06-15	35	C5	A5	SYBR GREEN	Unknown	FOS	31.55	-	Positive	38	500
2023-06-15	43	C6	A6	SYBR GREEN	Unknown	FOS	32.5	-	Positive	38	500
2023-06-15	51	C7	A7	SYBR GREEN	Unknown	FOS	31.83	-	Positive	38	500
2023-06-15	59	C8	A8	SYBR GREEN	Unknown	FOS	32.45	-	Positive	38	500
2023-06-15	67	C9	A9	SYBR GREEN	Unknown	FOS	31.07	-	Positive	38	500
2023-06-15	4	D1	B1	SYBR GREEN	Unknown	FOS	32.17	-	Positive	38	500
2023-06-15	76	D10	B1	SYBR GREEN	Unknown	C12orf54	30.62	-	Positive	38	500
2023-06-15	84	D11	B2	SYBR GREEN	Unknown	C12orf54	30.92	-	Positive	38	500
2023-06-15	92	D12	B3	SYBR GREEN	Unknown	C12orf54	31.09	-	Positive	38	500
2023-06-15	12	D2	B2	SYBR GREEN	Unknown	FOS	27.15	-	Positive	38	500
2023-06-15	20	D3	B3	SYBR GREEN	Unknown	FOS	33.55	-	Positive	38	500
2023-06-15	28	D4	B4	SYBR GREEN	Unknown	FOS	31.52	-	Positive	38	500
2023-06-15	36	D5	B5	SYBR GREEN	Unknown	FOS	31.52	-	Positive	38	500
2023-06-15	44	D6	B6	SYBR GREEN	Unknown	FOS	30.8	-	Positive	38	500
2023-06-15	52	D7	B7	SYBR GREEN	Unknown	FOS	30.86	-	Positive	38	500
2023-06-15	60	D8	B8	SYBR GREEN	Unknown	FOS	28.84	-	Positive	38	500
2023-06-15	68	D9	B9	SYBR GREEN	Unknown	FOS	28.18	-	Positive	38	500
2023-06-15	5	E1	A1	SYBR GREEN	Unknown	GPR1	29.89	-	Positive	38	500
2023-06-15	77	E10	B4	SYBR GREEN	Unknown	C12orf54	28.9	-	Positive	38	500
2023-06-15	85	E11	B5	SYBR GREEN	Unknown	C12orf54	31.45	-	Positive	38	500
2023-06-15	93	E12	B6	SYBR GREEN	Unknown	C12orf54	31.86	-	Positive	38	500
2023-06-15	13	E2	A2	SYBR GREEN	Unknown	GPR1	31.23	-	Positive	38	500
2023-06-15	21	E3	A3	SYBR GREEN	Unknown	GPR1	31.53	-	Positive	38	500
2023-06-15	29	E4	A4	SYBR GREEN	Unknown	GPR1	31.45	-	Positive	38	500
2023-06-15	37	E5	A5	SYBR GREEN	Unknown	GPR1	32.7	-	Positive	38	500
2023-06-15	45	E6	A6	SYBR GREEN	Unknown	GPR1	31.2	-	Positive	38	500
2023-06-15	53	E7	A7	SYBR GREEN	Unknown	GPR1	31.29	-	Positive	38	500
2023-06-15	61	E8	A8	SYBR GREEN	Unknown	GPR1	31.76	-	Positive	38	500
2023-06-15	69	E9	A9	SYBR GREEN	Unknown	GPR1	31.01	-	Positive	38	500
2023-06-15	6	F1	B1	SYBR GREEN	Unknown	GPR1	31.95	-	Positive	38	500
2023-06-15	78	F10	B7	SYBR GREEN	Unknown	C12orf54	30.59	-	Positive	38	500
2023-06-15	86	F11	B8	SYBR GREEN	Unknown	C12orf54	30.51	-	Positive	38	500
2023-06-15	94	F12	B9	SYBR GREEN	Unknown	C12orf54	31.95	-	Positive	38	500
2023-06-15	14	F2	B2	SYBR GREEN	Unknown	GPR1	27.89	-	Positive	38	500
2023-06-15	22	F3	B3	SYBR GREEN	Unknown	GPR1	31.02	-	Positive	38	500
2023-06-15	30	F4	B4	SYBR GREEN	Unknown	GPR1	29.66	-	Positive	38	500
2023-06-15	38	F5	B5	SYBR GREEN	Unknown	GPR1	31.06	-	Positive	38	500
2023-06-15	46	F6	B6	SYBR GREEN	Unknown	GPR1	30.1	-	Positive	38	500
2023-06-15	54	F7	B7	SYBR GREEN	Unknown	GPR1	32.72	-	Positive	38	500
2023-06-15	62	F8	B8	SYBR GREEN	Unknown	GPR1	29.78	-	Positive	38	500
2023-06-15	70	F9	B9	SYBR GREEN	Unknown	GPR1	26.91	-	Positive	38	500
2023-06-15	7	G1	A1	SYBR GREEN	Unknown	OR9A4	36.65	-	Positive	38	500
2023-06-15	79	G10	A1	SYBR GREEN	Unknown	MYO5B	34.72	-	Positive	38	500
2023-06-15	87	G11	A2	SYBR GREEN	Unknown	MYO5B	35.46	-	Positive	38	500
2023-06-15	95	G12	A3	SYBR GREEN	Unknown	MYO5B	36.11	-	Positive	38	500
2023-06-15	15	G2	A2	SYBR GREEN	Unknown	OR9A4	31.13	-	Positive	38	500
2023-06-15	23	G3	A3	SYBR GREEN	Unknown	OR9A4	31.91	-	Positive	38	500
2023-06-15	31	G4	A4	SYBR GREEN	Unknown	OR9A4	31.15	-	Positive	38	500
2023-06-15	39	G5	A5	SYBR GREEN	Unknown	OR9A4	31.48	-	Positive	38	500
2023-06-15	47	G6	A6	SYBR GREEN	Unknown	OR9A4	32.1	-	Positive	38	500
2023-06-15	55	G7	A7	SYBR GREEN	Unknown	OR9A4	31.45	-	Positive	38	500
2023-06-15	63	G8	A8	SYBR GREEN	Unknown	OR9A4	31.07	-	Positive	38	500
2023-06-15	71	G9	A9	SYBR GREEN	Unknown	OR9A4	31.15	-	Positive	38	500
2023-06-15	8	H1	B1	SYBR GREEN	Unknown	OR9A4	29.95	-	Positive	38	500
2023-06-15	80	H10	A4	SYBR GREEN	Unknown	MYO5B	35.11	-	Positive	38	500
2023-06-15	88	H11	A5	SYBR GREEN	Unknown	MYO5B	34.41	-	Positive	38	500
2023-06-15	96	H12	A6	SYBR GREEN	Unknown	MYO5B	35.9	-	Positive	38	500
2023-06-15	16	H2	B2	SYBR GREEN	Unknown	OR9A4	24.77	-	Positive	38	500
2023-06-15	24	H3	B3	SYBR GREEN	Unknown	OR9A4	31.28	-	Positive	38	500
2023-06-15	32	H4	B4	SYBR GREEN	Unknown	OR9A4	27.77	-	Positive	38	500
2023-06-15	40	H5	B5	SYBR GREEN	Unknown	OR9A4	31.08	-	Positive	38	500
2023-06-15	48	H6	B6	SYBR GREEN	Unknown	OR9A4	28.6	-	Positive	38	500
2023-06-15	56	H7	B7	SYBR GREEN	Unknown	OR9A4	31.12	-	Positive	38	500
2023-06-15	64	H8	B8	SYBR GREEN	Unknown	OR9A4	28.56	-	Positive	38	500
2023-06-15	72	H9	B9	SYBR GREEN	Unknown	OR9A4	26	-	Positive	38	500

## Sheet: Sheet2
Sample Name	Item	Ct
A1	C12orf54	31.11					A1	C12orf54	31.11	24.41	6.7	7.13667	0.938814	1				1
A2	C12orf54	32.87					A2	C12orf54	32.87	24.52	8.35		1.17001
A3	C12orf54	31.2					A3	C12orf54	31.2	24.84	6.36		0.891172
A4	C12orf54	34.51					A4	C12orf54	34.51	23.92	10.59	7.13667	1.48389	1.27184				1.27184
A5	C12orf54	33.29					A5	C12orf54	33.29	24.53	8.76		1.22746
A6	C12orf54	32.5					A6	C12orf54	32.5	24.62	7.88		1.10416
A7	C12orf54	31.5					A7	C12orf54	31.5	24.31	7.19	7.13667	1.00747	1.3872				1.3872
A8	C12orf54	32.78					A8	C12orf54	32.78	23.98	8.8		1.23307
A9	C12orf54	37.58					A9	C12orf54	37.58	23.87	13.71		1.92106
B1	C12orf54	30.62					B1	C12orf54	30.62	24.62	6	7.13667	0.840729	0.886502				0.886502
B2	C12orf54	30.92					B2	C12orf54	30.92	24.62	6.3		0.882765
B3	C12orf54	31.09					B3	C12orf54	31.09	24.41	6.68		0.936011
B4	C12orf54	28.9					B4	C12orf54	28.9	23.63	5.27	7.13667	0.73844	0.948622				0.948622
B5	C12orf54	31.45					B5	C12orf54	31.45	23.95	7.5		1.05091
B6	C12orf54	31.86					B6	C12orf54	31.86	24.32	7.54		1.05652
B7	C12orf54	30.59					B7	C12orf54	30.59	24.12	6.47	7.13667	0.906586	0.993461				0.993461
B8	C12orf54	30.51					B8	C12orf54	30.51	24.24	6.27		0.878561
B9	C12orf54	31.95					B9	C12orf54	31.95	23.42	8.53		1.19524
A1	FOS	32.25
A2	FOS	32.66
A3	FOS	31.44
A4	FOS	31.68
A5	FOS	31.55					A1	FOS	32.25	24.41	7.84	7.52667	1.04163	1				1
A6	FOS	32.5					A2	FOS	32.66	24.52	8.14		1.08149
A7	FOS	31.83					A3	FOS	31.44	24.84	6.6		0.876882
A8	FOS	32.45					A4	FOS	31.68	23.92	7.76	7.52667	1.031	1.00354				1.00354
A9	FOS	31.07					A5	FOS	31.55	24.53	7.02		0.932684
B1	FOS	32.17					A6	FOS	32.5	24.62	7.88		1.04694
B2	FOS	27.15					A7	FOS	31.83	24.31	7.52	7.52667	0.999114	1.02702				1.02702
B3	FOS	33.55					A8	FOS	32.45	23.98	8.47		1.12533
B4	FOS	31.52					A9	FOS	31.07	23.87	7.2		0.956599
B5	FOS	31.52					B1	FOS	32.17	24.62	7.55	7.52667	1.0031	0.851196				0.851196
B6	FOS	30.8					B2	FOS	27.15	24.62	2.53		0.336138
B7	FOS	30.86					B3	FOS	33.55	24.41	9.14		1.21435
B8	FOS	28.84					B4	FOS	31.52	23.63	7.89	7.52667	1.04827	0.971656				0.971656
B9	FOS	28.18					B5	FOS	31.52	23.95	7.57		1.00576
A1	GAPDH	24.41					B6	FOS	30.8	24.32	6.48		0.860939
A2	GAPDH	24.52					B7	FOS	30.86	24.12	6.74	7.52667	0.895483	0.71302				0.71302
A3	GAPDH	24.84					B8	FOS	28.84	24.24	4.6		0.61116
A4	GAPDH	23.92					B9	FOS	28.18	23.42	4.76		0.632418
A5	GAPDH	24.53
A6	GAPDH	24.62
A7	GAPDH	24.31
A8	GAPDH	23.98					A1	GPR1	29.89	24.41	5.48	6.29333	0.870763	1				1
A9	GAPDH	23.87					A2	GPR1	31.23	24.52	6.71		1.06621
B1	GAPDH	24.62					A3	GPR1	31.53	24.84	6.69		1.06303
B2	GAPDH	24.62					A4	GPR1	31.45	23.92	7.53	6.29333	1.1965	1.18008				1.18008
B3	GAPDH	24.41					A5	GPR1	32.7	24.53	8.17		1.2982
B4	GAPDH	23.63					A6	GPR1	31.2	24.62	6.58		1.04555
B5	GAPDH	23.95					A7	GPR1	31.29	24.31	6.98	6.29333	1.10911	1.15996				1.15996
B6	GAPDH	24.32					A8	GPR1	31.76	23.98	7.78		1.23623
B7	GAPDH	24.12					A9	GPR1	31.01	23.87	7.14		1.13453
B8	GAPDH	24.24					B1	GPR1	31.95	24.62	7.33	6.29333	1.16472	0.911547				0.911547
B9	GAPDH	23.42					B2	GPR1	27.89	24.62	3.27		0.519597
A1	GPR1	29.89					B3	GPR1	31.02	24.41	6.61		1.05032
A2	GPR1	31.23					B4	GPR1	29.66	23.63	6.03	6.29333	0.958157	1.00212				1.00212
A3	GPR1	31.53					B5	GPR1	31.06	23.95	7.11		1.12977
A4	GPR1	31.45					B6	GPR1	30.1	24.32	5.78		0.918432
A5	GPR1	32.7					B7	GPR1	32.72	24.12	8.6	6.29333	1.36653	0.933792				0.933792
A6	GPR1	31.2					B8	GPR1	29.78	24.24	5.54		0.880297
A7	GPR1	31.29					B9	GPR1	26.91	23.42	3.49		0.554555
A8	GPR1	31.76
A9	GPR1	31.01
B1	GPR1	31.95					A1	OR9A4	36.65	24.41	12.24	8.64	1.41667	1				1
B2	GPR1	27.89					A2	OR9A4	31.13	24.52	6.61		0.765046
B3	GPR1	31.02					A3	OR9A4	31.91	24.84	7.07		0.818287
B4	GPR1	29.66					A4	OR9A4	31.15	23.92	7.23	8.64	0.836806	0.835648				0.835648
B5	GPR1	31.06					A5	OR9A4	31.48	24.53	6.95		0.804398
B6	GPR1	30.1					A6	OR9A4	32.1	24.62	7.48		0.865741
B7	GPR1	32.72					A7	OR9A4	31.45	24.31	7.14	8.64	0.826389	0.829861				0.829861
B8	GPR1	29.78					A8	OR9A4	31.07	23.98	7.09		0.820602
B9	GPR1	26.91					A9	OR9A4	31.15	23.87	7.28		0.842593
A1	MYO5B	34.72					B1	OR9A4	29.95	24.62	5.33	8.64	0.616898	0.476466				0.476466
A2	MYO5B	35.46					B2	OR9A4	24.77	24.62	0.15		0.0173611
A3	MYO5B	36.11					B3	OR9A4	31.28	24.41	6.87		0.795139
A4	MYO5B	35.11					B4	OR9A4	27.77	23.63	4.14	8.64	0.479167	0.599923				0.599923
A5	MYO5B	34.41					B5	OR9A4	31.08	23.95	7.13		0.825231
A6	MYO5B	35.9					B6	OR9A4	28.6	24.32	4.28		0.49537
A1	OR9A4	36.65					B7	OR9A4	31.12	24.12	7	8.64	0.810185	0.536265				0.536265
A2	OR9A4	31.13					B8	OR9A4	28.56	24.24	4.32		0.5
A3	OR9A4	31.91					B9	OR9A4	26	23.42	2.58		0.298611
A4	OR9A4	31.15
A5	OR9A4	31.48
A6	OR9A4	32.1
A7	OR9A4	31.45
A8	OR9A4	31.07
A9	OR9A4	31.15
B1	OR9A4	29.95
B2	OR9A4	24.77
B3	OR9A4	31.28
B4	OR9A4	27.77
B5	OR9A4	31.08
B6	OR9A4	28.6
B7	OR9A4	31.12
B8	OR9A4	28.56
B9	OR9A4	26
