# Supplementary material for: Identification of novel biomarkers in obstructive sleep apnea via integrated bioinformatics analysis and experimental validation
Source: PeerJ journal article supplement (doi:10.7717/peerj.16608), 2023-12-04
Supplement: RTPCR.zip [file PCR2.xlsx]

## Sheet: Sheet1
Date	ID	Well	Sample Name	Reporter	Sample Type	Item	Ct	Quantity	Test Result	Qualitative(Ct)	Quantitative(Copy)
2023-06-15	1	A1	A1	SYBR GREEN	Unknown	RAB39B	31.15	-	Positive	38	500
2023-06-15	9	A2	A2	SYBR GREEN	Unknown	RAB39B	33.14	-	Positive	38	500
2023-06-15	17	A3	A3	SYBR GREEN	Unknown	RAB39B	32.33	-	Positive	38	500
2023-06-15	25	A4	A4	SYBR GREEN	Unknown	RAB39B	30.38	-	Positive	38	500
2023-06-15	33	A5	A5	SYBR GREEN	Unknown	RAB39B	32.25	-	Positive	38	500
2023-06-15	41	A6	A6	SYBR GREEN	Unknown	RAB39B	31.6	-	Positive	38	500
2023-06-15	49	A7	A7	SYBR GREEN	Unknown	RAB39B	33.24	-	Positive	38	500
2023-06-15	57	A8	A8	SYBR GREEN	Unknown	RAB39B	32.45	-	Positive	38	500
2023-06-15	65	A9	A9	SYBR GREEN	Unknown	RAB39B	33.07	-	Positive	38	500
2023-06-15	2	B1	B1	SYBR GREEN	Unknown	RAB39B	30.07	-	Positive	38	500
2023-06-15	10	B2	B2	SYBR GREEN	Unknown	RAB39B	29.15	-	Positive	38	500
2023-06-15	18	B3	B3	SYBR GREEN	Unknown	RAB39B	30.25	-	Positive	38	500
2023-06-15	26	B4	B4	SYBR GREEN	Unknown	RAB39B	29.12	-	Positive	38	500
2023-06-15	34	B5	B5	SYBR GREEN	Unknown	RAB39B	30.21	-	Positive	38	500
2023-06-15	42	B6	B6	SYBR GREEN	Unknown	RAB39B	29.24	-	Positive	38	500
2023-06-15	50	B7	B7	SYBR GREEN	Unknown	RAB39B	30.14	-	Positive	38	500
2023-06-15	58	B8	B8	SYBR GREEN	Unknown	RAB39B	29.82	-	Positive	38	500
2023-06-15	66	B9	B9	SYBR GREEN	Unknown	RAB39B	29.28	-	Positive	38	500
2023-06-15	3	C1	A1	SYBR GREEN	Unknown	KLHL4	37.89	-	Positive	38	500
2023-06-15	11	C2	A2	SYBR GREEN	Unknown	KLHL4	36.21	-	Positive	38	500
2023-06-15	19	C3	A3	SYBR GREEN	Unknown	KLHL4	36.54	-	Positive	38	500
2023-06-15	27	C4	A4	SYBR GREEN	Unknown	KLHL4	35.42	-	Positive	38	500
2023-06-15	35	C5	A5	SYBR GREEN	Unknown	KLHL4	36.72	-	Positive	38	500
2023-06-15	43	C6	A6	SYBR GREEN	Unknown	KLHL4	36.24	-	Positive	38	500
2023-06-15	51	C7	A7	SYBR GREEN	Unknown	KLHL4	36.21	-	Positive	38	500
2023-06-15	59	C8	A8	SYBR GREEN	Unknown	KLHL4	36.71	-	Positive	38	500
2023-06-15	67	C9	A9	SYBR GREEN	Unknown	KLHL4	36.24	-	Positive	38	500
2023-06-15	4	D1	B1	SYBR GREEN	Unknown	KLHL4	31.95	-	Positive	38	500
2023-06-15	12	D2	B2	SYBR GREEN	Unknown	KLHL4	32.29	-	Positive	38	500
2023-06-15	20	D3	B3	SYBR GREEN	Unknown	KLHL4	31.22	-	Positive	38	500
2023-06-15	28	D4	B4	SYBR GREEN	Unknown	KLHL4	33.62	-	Positive	38	500
2023-06-15	36	D5	B5	SYBR GREEN	Unknown	KLHL4	32.14	-	Positive	38	500
2023-06-15	44	D6	B6	SYBR GREEN	Unknown	KLHL4	32.14	-	Positive	38	500
2023-06-15	52	D7	B7	SYBR GREEN	Unknown	KLHL4	32.72	-	Positive	38	500
2023-06-15	60	D8	B8	SYBR GREEN	Unknown	KLHL4	32.78	-	Positive	38	500
2023-06-15	68	D9	B9	SYBR GREEN	Unknown	KLHL4	33.91	-	Positive	38	500
2023-06-15	5	E1	A7	SYBR GREEN	Unknown	MYO5B	32.25	-	Positive	38	500
2023-06-15	13	E2	A8	SYBR GREEN	Unknown	MYO5B	36.18	-	Positive	38	500
2023-06-15	21	E3	A9	SYBR GREEN	Unknown	MYO5B	32.41	-	Positive	38	500
2023-06-15	29	E4	B1	SYBR GREEN	Unknown	MYO5B	30.15	-	Positive	38	500
2023-06-15	37	E5	B2	SYBR GREEN	Unknown	MYO5B	30.42	-	Positive	38	500
2023-06-15	45	E6	B3	SYBR GREEN	Unknown	MYO5B	30.21	-	Positive	38	500
2023-06-15	53	E7	B4	SYBR GREEN	Unknown	MYO5B	31.24	-	Positive	38	500
2023-06-15	61	E8	B5	SYBR GREEN	Unknown	MYO5B	31.45	-	Positive	38	500
2023-06-15	69	E9	B6	SYBR GREEN	Unknown	MYO5B	31.35	-	Positive	38	500
2023-06-15	6	F1	B7	SYBR GREEN	Unknown	MYO5B	32.14	-	Positive	38	500
2023-06-15	14	F2	B8	SYBR GREEN	Unknown	MYO5B	32.27	-	Positive	38	500
2023-06-15	22	F3	B9	SYBR GREEN	Unknown	MYO5B	32.24	-	Positive	38	500

## Sheet: Sheet2
Sample Name	Item	Ct
A1	RAB39B	31.15				A1	RAB39B	31.15	24.41	6.74	7.61667	0.884902	1			1
A2	RAB39B	33.14				A2	RAB39B	33.14	24.52	8.62		1.13173
A3	RAB39B	32.33				A3	RAB39B	32.33	24.84	7.49		0.98337
A4	RAB39B	30.38				A4	RAB39B	30.38	23.92	6.46	7.61667	0.84814	0.926039			0.926039
A5	RAB39B	32.25				A5	RAB39B	32.25	24.53	7.72		1.01357
A6	RAB39B	31.6				A6	RAB39B	31.6	24.62	6.98		0.916411
A7	RAB39B	33.24				A7	RAB39B	33.24	24.31	8.93	7.61667	1.17243	1.16411			1.16411
A8	RAB39B	32.45				A8	RAB39B	32.45	23.98	8.47		1.11204
A9	RAB39B	33.07				A9	RAB39B	33.07	23.87	9.2		1.20788
B1	RAB39B	30.07				B1	RAB39B	30.07	24.62	5.45	7.61667	0.715536	0.692341			0.692341
B2	RAB39B	29.15				B2	RAB39B	29.15	24.62	4.53		0.594748
B3	RAB39B	30.25				B3	RAB39B	30.25	24.41	5.84		0.76674
B4	RAB39B	29.12				B4	RAB39B	29.12	23.63	5.49	7.61667	0.720788	0.72954			0.72954
B5	RAB39B	30.21				B5	RAB39B	30.21	23.95	6.26		0.821882
B6	RAB39B	29.24				B6	RAB39B	29.24	24.32	4.92		0.645952
B7	RAB39B	30.14				B7	RAB39B	30.14	24.12	6.02	7.61667	0.790372	0.764114			0.764114
B8	RAB39B	29.82				B8	RAB39B	29.82	24.24	5.58		0.732604
B9	RAB39B	29.28				B9	RAB39B	29.28	23.42	5.86		0.769365
A1	KLHL4	37.89
A2	KLHL4	36.21
A3	KLHL4	36.54				A1	KLHL4	37.89	24.41	13.48	12.29	1.09683	1			1
A4	KLHL4	35.42				A2	KLHL4	36.21	24.52	11.69		0.95118
A5	KLHL4	36.72				A3	KLHL4	36.54	24.84	11.7		0.951993
A6	KLHL4	36.24				A4	KLHL4	35.42	23.92	11.5	12.29	0.93572	0.957689			0.957689
A7	KLHL4	36.21				A5	KLHL4	36.72	24.53	12.19		0.991863
A8	KLHL4	36.71				A6	KLHL4	36.24	24.62	11.62		0.945484
A9	KLHL4	36.24				A7	KLHL4	36.21	24.31	11.9	12.29	0.968267	1.00353			1.00353
B1	KLHL4	31.95				A8	KLHL4	36.71	23.98	12.73		1.0358
B2	KLHL4	32.29				A9	KLHL4	36.24	23.87	12.37		1.00651
B3	KLHL4	31.22				B1	KLHL4	31.95	24.62	7.33	12.29	0.59642	0.591538			0.591538
B4	KLHL4	33.62				B2	KLHL4	32.29	24.62	7.67		0.624085
B5	KLHL4	32.14				B3	KLHL4	31.22	24.41	6.81		0.554109
B6	KLHL4	32.14				B4	KLHL4	33.62	23.63	9.99	12.29	0.812856	0.70518			0.70518
B7	KLHL4	32.72				B5	KLHL4	32.14	23.95	8.19		0.666395
B8	KLHL4	32.78				B6	KLHL4	32.14	24.32	7.82		0.63629
B9	KLHL4	33.91				B7	KLHL4	32.72	24.12	8.6	12.29	0.699756	0.74939			0.74939
A1	MYO5B	34.72				B8	KLHL4	32.78	24.24	8.54		0.694874
A2	MYO5B	35.46				B9	KLHL4	33.91	23.42	10.49		0.853539
A3	MYO5B	36.11
A4	MYO5B	35.11
A5	MYO5B	34.41				A1	MYO5B	34.72	24.41	10.31	10.84	0.951107	1			1
A6	MYO5B	35.9				A2	MYO5B	35.46	24.52	10.94		1.00923
A7	MYO5B	35.25				A3	MYO5B	36.11	24.84	11.27		1.03967
A8	MYO5B	36.18				A4	MYO5B	35.11	23.92	11.19	10.84	1.03229	0.994772			0.994772
A9	MYO5B	35.41				A5	MYO5B	34.41	24.53	9.88		0.911439
B1	MYO5B	30.15				A6	MYO5B	35.9	24.62	11.28		1.04059
B2	MYO5B	30.42				A7	MYO5B	35.25	24.31	10.94	10.84	1.00923	1.06642			1.06642
B3	MYO5B	30.21				A8	MYO5B	36.18	23.98	12.2		1.12546
B4	MYO5B	31.24				A9	MYO5B	35.41	23.87	11.54		1.06458
B5	MYO5B	31.45				B1	MYO5B	30.15	24.62	5.53	10.84	0.510148	0.526753			0.526753
B6	MYO5B	31.35				B2	MYO5B	30.42	24.62	5.8		0.535055
B7	MYO5B	32.14				B3	MYO5B	30.21	24.41	5.8		0.535055
B8	MYO5B	32.27				B4	MYO5B	31.24	23.63	7.61	10.84	0.70203	0.680812			0.680812
B9	MYO5B	32.24				B5	MYO5B	31.45	23.95	7.5		0.691882
						B6	MYO5B	31.35	24.32	7.03		0.648524
						B7	MYO5B	32.14	24.12	8.02	10.84	0.739852	0.76476			0.76476
						B8	MYO5B	32.27	24.24	8.03		0.740775
						B9	MYO5B	32.24	23.42	8.82		0.813653
